# Molecular-level comparison of dissolved organic matter in 11 major lakes in Japan by Orbitrap mass spectrometry

Ikuro Kasuga , Vitharuch Yuthawong, Futoshi Kurisu   
and Hiroaki Furumai 

## ABSTRACT

Dissolved organic matter (DOM) causes organic pollution in lakes, resulting in the occurrence of off-flavour etc. when lake water is used as a drinking water source. In this study, DOM in 11 major lakes in Japan was characterised by high-resolution Orbitrap mass spectrometry. Molecular formulas were assigned to 845–1,451 components per sample. Among them, 555 components were commonly found in all lakes. The DOM compositions of the 11 lakes were clustered into four groups. Correlation analysis could extract specific components whose relative intensities were associated with water quality indices such as specific ultraviolet absorbance, specific dissolved chemical oxygen demand (DCOD<sub>Mn</sub>), and specific trihalomethane formation potential ( $R = 0.80\text{--}0.93$ ,  $p < 0.05$ ). Although further molecular structural analyses of DOM components are necessary, these results could be informative for exploring key candidates related to specific water quality issues. Pre-treatment of samples with permanganate oxidation was applied to screen components which could contribute to DCOD<sub>Mn</sub>. DCOD<sub>Mn</sub> components accounted for only 7–30% of total peak intensities, indicating the limited performance of permanganate oxidation. Pre-treatment by permanganate coupled with Orbitrap MS revealed that components with higher molecular weight, higher oxygen-to-carbon ratios (O/C), and lower hydrogen-to-carbon ratios (H/C) could be responsible for DCOD<sub>Mn</sub>.

**Key words** | chemical oxygen demand, dissolved organic matter, lake, molecular characterisation, Orbitrap mass spectrometry

**Ikuro Kasuga**  (corresponding author)  
VNU Vietnam Japan University,  
My Dinh Campus, Luu Huu Phuoc Street, My Dinh 1  
Ward, Nam Tu Liem District, Hanoi,  
Vietnam  
E-mail: [kasuga@env.t.u-tokyo.ac.jp](mailto:kasuga@env.t.u-tokyo.ac.jp)

**Ikuro Kasuga**  
**Vitharuch Yuthawong**  
Department of Urban Engineering,  
School of Engineering,  
The University of Tokyo,  
7-3-1 Hongo, Bunkyo, Tokyo 113-8656,  
Japan

**Vitharuch Yuthawong**  
Department of Environmental Engineering, Faculty  
of Engineering,  
Kasetsart University,  
Bangkok 10900,  
Thailand

**Futoshi Kurisu**   
**Hiroaki Furumai**   
Research Center for Water Environment  
Technology, School of Engineering,  
The University of Tokyo,  
7-3-1 Hongo, Bunkyo, Tokyo 113-8656,  
Japan

## INTRODUCTION

Eutrophication in closed water bodies remains a major environmental issue in the world (Le Moal *et al.* 2019). In Japan, 14.6% and 51.2% of lakes met the environmental water quality standards for total nitrogen and total phosphorus concentrations, respectively (Ministry of the Environment in Japan 2018). Due to the chronic state of eutrophication in lake water environments, 53.2% of lakes complied with the environmental water quality standard for chemical oxidation demand determined by potassium permanganate oxidation (COD<sub>Mn</sub>; Ministry of the Environment in Japan 2018). Intensive countermeasures for the

improvement of water quality and pollutant load control have been implemented in 11 major lakes in Japan under the law concerning special measures for conservation of lake water quality enacted in 1984. However, no designated lakes have ever complied with the COD<sub>Mn</sub> standard, and little information is available regarding organic matter elevation in these lakes. Increase of dissolved organic carbon (DOC) has also been reported in lakes in the north-eastern USA, which could be associated with many factors including extreme precipitation events, enhanced organic matter production due to climate change (Strock

*et al.* 2016, 2017). Dissolved organic matter (DOM) is a fraction of the organic matter in aquatic environments that causes various problems in water use such as formation of disinfection by-products (Imai *et al.* 2003). In lake environments, not only various external sources but also internal sources, such as algae and sediment, should be considered as origins of DOM (Jiang *et al.* 2018). Furthermore, DOM composition can be influenced by physicochemical and biological reactions more prominently in lakes with longer retention times (Kawasaki *et al.* 2013; Bittar *et al.* 2015; Maizel *et al.* 2017). These factors make it difficult to understand DOM properties in lake environments.

High-resolution and accurate mass spectrometry, such as Fourier transform ion cyclotron mass spectrometry (FT-ICR MS) and Orbitrap MS, is the first technology to fully resolve the complex composition of DOM, which cannot be achieved by conventional water quality indices such as biochemical oxygen demand (BOD), COD, and total organic carbon (TOC). Recently, FT-ICR MS with the highest resolution has been applied to analyse DOM in lake water (Bai *et al.* 2017; Mostovaya *et al.* 2017). Furthermore, Orbitrap MS has a smaller footprint with equivalent resolution. The DOM in various water environments, including lakes, has been characterised by Orbitrap MS (Urai *et al.* 2014; Hawkes *et al.* 2016; Phungsai *et al.* 2016; Yuthawong *et al.* 2017, 2019). The DOM composition (revealed by FT-ICR MS) of 120 lakes in Sweden indicated the DOM chemodiversity was associated with DOM and nutrient concentrations (Kellerman *et al.* 2014). Other factors such as climate change and watershed land-use patterns could also have impacts on DOM properties in lakes. However, the DOM composition in lakes in Japan has not been compared despite their long-term organic pollution. Thus, this study aimed to compare the DOM composition in all 11 lakes in Japan designated by the law concerning special measures for conservation of lake water quality. Orbitrap MS was applied to resolve DOM composition at the molecular level and find out the relationship between organic pollution indices (ultraviolet absorbance, dissolved COD<sub>Mn</sub> (DCOD<sub>Mn</sub>) trihalomethane formation potential (THMFP), chlorophyll-a (Chl-a)) and common DOM composition. Moreover, molecular components that can contribute to dissolved COD<sub>Mn</sub> (DCOD<sub>Mn</sub>) were screened by the combination of permanganate oxidation and Orbitrap MS.

## METHODS

### Sampling

As shown in Table 1 and Figure S1 in Supplementary Materials, surface water samples were collected from 11 major lakes (Lake Hachiro, Lake Kamafusa (reservoir), Lake Nojiri, Lake Suwa, Lake Kasumigaura, Lake Tega, Lake Inba, Lake Biwa, Lake Nakaumi, Lake Shinji, and Lake Kojima) in Japan in October and November 2017. These lakes have been designated by the government as special lakes that need intensive measures for conserving water quality. Among them, Lake Kamafusa, Lake Kasumigaura, Lake Inba, and Lake Biwa are used as a source for drinking water. Samples were stored in 2 L glass bottles, which had been baked at 550 °C for 6 h to remove residual carbon, and then transported in cooling boxes to the laboratory within 24 h.

### Water quality analysis

Unfiltered water samples were directly subjected to analysis of non-purgeable TOC with a TOC analyser (TOC-LCSH, Shimadzu, Japan) and total COD<sub>Mn</sub> (TCOD<sub>Mn</sub>), according to Japanese Industrial Standards (JIS method K0102). To analyse DOM fraction, water samples were treated with a 0.3 µm glass fibre filter (GF-75, Advantec, Japan). DOC and DCOD<sub>Mn</sub> were determined. Moreover, ultraviolet absorbance at 254 nm was measured with a visible-UV spectrophotometer (UH3500, Hitachi, Japan) using a quartz cell (1 cm). To determine the THMFP, sodium hypochlorite was added to the filtered samples so that the free chlorine residual after 24 h of incubation in the dark was 1–2 mg/L. After quenching the free chlorine residual with a sodium thiosulfate solution, trihalomethane was determined by headspace gas chromatography (GC-2010 Plus with ECD detector, Shimadzu, Japan). In this analysis, *p*-bromofluorobenzene was used as an internal standard. Chl-a was extracted by 90% (v/v) acetone from algae collected on 1.0 µm glass fibre filters (Whatman, GF/B). The absorbance at 750, 663, 645, and 630 nm of supernatant was measured with a UH3500 in order to calculate Chl-a concentration (Japan Water Works Association 2007).

### Orbitrap MS analysis

Orbitrap MS can preferentially detect lower molecular weight DOM compared with FT-ICR MS (Hawkes *et al.*

**Table 1** | Basic specifications of the 11 studied lakes and sampling information

| Lake and Reservoir        | Volume ( $\times 1,000 \text{ m}^3$ ) | Average depth (m) | Sampling site           | Sampling date              |            |
|---------------------------|---------------------------------------|-------------------|-------------------------|----------------------------|------------|
| Lake Hachiro              | 132,600                               | 2.8               | N 39.9253<br>E 139.9905 | 8 Nov 2017                 |            |
| Kamafusa Lake (reservoir) | 39,300                                | 11.6              | N 38.2015<br>E 140.6953 | 18 Oct 2017<br>15 Nov 2017 |            |
| Lake Nojiri               | 96,000                                | 21.0              | N 36.4930<br>E 138.1315 | 11 Oct 2017                |            |
| Lake Suwa                 | 62,987                                | 4.7               | N 36.0497<br>E 138.0851 | 11 Oct 2017                |            |
| Lake Kasumigaura          | 850,000                               | 4                 | N 36.0358<br>E 140.4036 | 11 Oct 2017                |            |
| Lake Tega                 | 5,600                                 | 0.86              | N 35.8604<br>E 140.0254 | 23 Oct 2017                |            |
| Lake Inba                 | 27,700                                | 1.7               | N 35.7579<br>E 140.1987 | 23 Oct 2017                |            |
| Lake Biwa                 | North Lake                            | 27,300,000        | 43                      | N 35.2161<br>E 135.9986    | 1 Nov 2017 |
|                           | South Lake                            | 200,000           | 4                       | N 35.0672<br>E 135.9075    |            |
| Lake Nakaumi              | 521,000                               | 5.4               | N 35.4680<br>E 133.1868 | 1 Nov 2017                 |            |
| Lake Shinji               | 366,000                               | 4.5               | N 35.4488<br>E 132.9566 | 1 Nov 2017                 |            |
| Lake Kojima               | 26,072                                | 2.1               | N 34.5752<br>E 133.9377 | 21 Nov 2017                |            |

2016). The target in this study was low molecular weight DOM ( $m/z = 100\text{--}1,000$ ). One litre of the filtrated water sample was subjected to solid-phase extraction using Bond Elut PPL (Agilent, CA; Dittmar *et al.* 2008). The DOM extracts eluted in 10 mL of methanol were analysed by Orbitrap MS (Exactive, Thermo Fisher Scientific, MA) in flow injection mode. Electrospray ionisation in negative ion mode was selected. Accurate mass data were obtained in the range of  $m/z$  100–1,000. Mass accuracy was maintained below 2 ppm with external and internal mass calibration. While external calibration was performed by Proteomass ESI (Sigma-Aldrich, USA), internal calibration was accomplished by referring to a lock mass peak ( $m/z = 255.23295$ ) that was detected throughout the analysis. The analytical conditions were the same as in our previous studies (Urai *et al.* 2014; Phungsai *et al.* 2016; Yuthawong *et al.* 2017, 2019; Phungsai *et al.* 2018).

The mass data were treated by Sieve Analysis 2.2 (Thermo Scientific, USA) to eliminate background peaks. Components were extracted by integrating isotopologues and different adduct ions. Molecular formulas were assigned to extracted components by compound identification algorithm (Kujawinski & Behn 2006) considering the combination of carbon (0–39), hydrogen (0–72), oxygen (0–20), nitrogen (0–3), and sulphur (0–1). The elemental ratios ( $0.2 \leq \text{H:C} \leq 3.1$ ;  $\text{O:C} \leq 1.2$ ;  $\text{N:C} \leq 1.3$ ), the nitrogen rule, and the range of double-bond equivalent minus oxygen (DBE-O) ( $-10 \leq \text{DBE-O} \leq 10$ ) were also considered for assignment (Kind & Fiehn 2007; Herzsprung *et al.* 2014). Elemental compositions of molecular formulas were demonstrated by plotting hydrogen-to-carbon ratios (H/C) and oxygen-to-carbon ratios (O/C) on van Krevelen diagrams. Molecular formulas were categorised based on the elemental composition of biomolecules: lignin ( $1.0 \leq \text{H/C} \leq 1.4$

and  $0.35 \leq O/C \leq 0.50$ ), tannin ( $0.75 \leq H/C \leq 1.4$  and  $0.35 \leq O/C \leq 0.85$ ), peptides ( $1.60 \leq H/C \leq 1.80$  and  $0.35 \leq O/C \leq 0.50$ ), lipids ( $1.75 \leq H/C \leq 2.25$  and  $0.02 \leq O/C \leq 0.15$ ), and carbohydrates ( $1.50 \leq H/C \leq 2.00$  and  $0.50 \leq O/C \leq 1.00$ ) (Kim et al. 2003, 2006). Binary data (presence and absence) of DOM composition was subjected to cluster analysis using Ward's method in XLSTAT version 19.7. The unsaturation of assigned molecular formulas was estimated by calculating the DBE-O to eliminate potential double bonds derived from carbonyl functional groups (Yuthawong et al. 2019).

### Screening of DCOD<sub>Mn</sub> components

Following Yuthawong et al. (2019), the components contributing to DCOD<sub>Mn</sub> were screened. Filtered water samples were oxidised by potassium permanganate under the same condition as the COD<sub>Mn</sub> analysis (JIS method K0102). After oxidation, DOM was extracted by solid-phase extraction and analysed by Orbitrap MS in the same manner. Non-oxidised and oxidised samples were compared to extract DCOD<sub>Mn</sub> components that were present in the non-oxidised samples but absent in the oxidised samples. Conversely, the components found in both non-oxidised and oxidised samples were defined as persistent

components, even though some components that were partially oxidised by permanganate were included.

## RESULTS AND DISCUSSION

### Water quality

Table 2 summarises water quality in the 11 studied lakes. The ranges of TOC and DOC were 1.5–5.8 mg C/L (mean: 3.3 mg C/L) and 1.3–5.0 mg C/L (mean: 2.7 mg C/L), respectively. Lake Kasumigaura had the highest TOC and DOC values, while Lake Kamafusa had the lowest TOC and DOC values. Moreover, DOC was the dominant fraction in all lakes, accounting for 70–105% of TOC (mean: 84%). The ranges of TCOD<sub>Mn</sub> and DCOD<sub>Mn</sub> were 1.4–7.8 mg/L (mean: 3.4 mg/L) and 1.2–3.8 mg/L (mean: 2.2 mg/L), respectively. The DCOD<sub>Mn</sub>/TCOD<sub>Mn</sub> ratios were in the range of 31–114% (mean: 72%). The lowest ratio was observed in Lake Suwa, where the highest Chl-a concentration was associated with the highest TCOD<sub>Mn</sub>. Furthermore, DOM in Lake Nakaumi (DCOD<sub>Mn</sub>/DOC = 1.27) was more preferably oxidised by permanganate than DOM in Lake Biwa (North; DCOD<sub>Mn</sub>/DOC = 0.55), indicating that the DOM composition contributing to DCOD<sub>Mn</sub> is dependent on lakes. The specific UV<sub>254</sub> values

**Table 2** | Water quality in the 11 studied lakes

|                     | TOC (mg C/L) | DOC (mg C/L) | TCOD <sub>Mn</sub> (mg/L) | DCOD <sub>Mn</sub> (mg/L) | UV <sub>254</sub> (1/cm) | SUVA (L/mg C/m) | Chl-a (µg/L) | TTHMFP (µg/L) |
|---------------------|--------------|--------------|---------------------------|---------------------------|--------------------------|-----------------|--------------|---------------|
| L. Hachiro          | 4.5          | 3.4          | 4.6                       | 3.2                       | 0.082                    | 2.41            | 31.5         | 85.3          |
| L. Kamafusa in Oct. | 1.5          | 1.4          | 1.4                       | 1.4                       | 0.034                    | 2.43            | NA           | 43.7          |
| L. Kamafusa in Nov. | 1.6          | 1.3          | 1.6                       | 1.4                       | 0.034                    | 2.62            | 3.5          | 44.7          |
| L. Nojiri           | 1.9          | 2.0          | 1.4                       | 1.6                       | 0.017                    | 0.85            | 1.7          | 17.1          |
| L. Suwa             | 3.2          | 3.0          | 7.8                       | 2.4                       | 0.045                    | 1.50            | 68.7         | 41.9          |
| L. Kasumigaura      | 5.8          | 5.0          | 5.2                       | 3.8                       | 0.075                    | 1.50            | 30.1         | 69.8          |
| L. Tega             | 4.5          | 3.2          | 4.0                       | 1.9                       | 0.037                    | 1.16            | 52.2         | 65.6          |
| L. Inba             | 4.9          | 3.6          | 5.0                       | 2.2                       | 0.045                    | 1.25            | 46.1         | 67.2          |
| L. Biwa North       | 2.5          | 2.2          | 1.6                       | 1.2                       | 0.023                    | 1.05            | 3.5          | 23.8          |
| L. Biwa South       | 2.3          | 2.1          | 1.6                       | 1.2                       | 0.022                    | 1.05            | 0.9          | 22.5          |
| L. Nakaumi          | 2.9          | 2.2          | 3.8                       | 2.8                       | 0.044                    | 2.00            | 4.5          | 259.6         |
| L. Shinji           | 2.7          | 1.9          | 2.6                       | 1.8                       | 0.043                    | 2.26            | 14.6         | 245.4         |
| L. Kojima           | 4.3          | 3.5          | 4.0                       | 3.2                       | 0.066                    | 1.89            | 18.5         | 126.7         |

NA: Not available.

( $UV_{254}/DOC$ , SUVA) of Lake Hachiro, Lake Kamafusa, Lake Nakaumi, and Lake Shinji were higher than or equal to 2.00 L/mgC/m. Higher specific  $UV_{254}$  values in these lakes demonstrated enrichment of unsaturated DOM. In addition, THMFP was in the range of 17.1–259.6  $\mu\text{g/L}$ . In particular, THMFP in the brackish lakes (Lake Nakaumi and Lake Shinji) and Lake Kojima was more than 100  $\mu\text{g/L}$  due to the predominance of brominated THM. The range of Chl-a concentration was 0.9–68.7  $\mu\text{g/L}$  (mean: 23.0  $\mu\text{g/L}$ ). Although the sampling was carried out in October–November, the Chl-a concentration in Lake Hachiro, Lake Suwa, Lake Kasumigaura, Lake Inba, and Lake Tega was more than 30  $\mu\text{g/L}$ . Eutrophication was still apparent in these shallow lakes even in autumn.

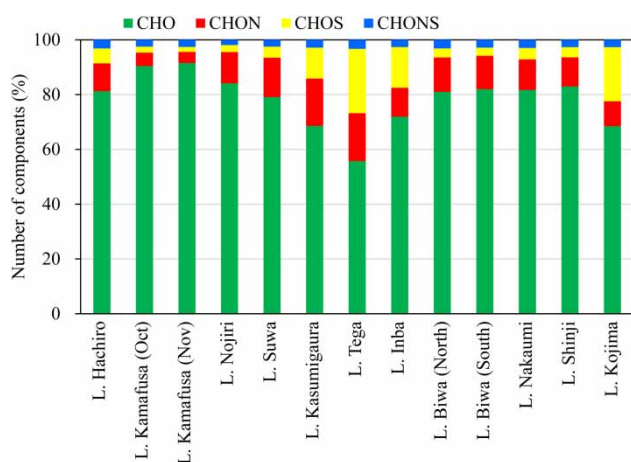

**Figure 1** | Compositions of molecular formulas in the 11 studied lakes.

## Characterisation of DOM by Orbitrap MS

Intensity-weighted average  $m/z$  values were similar among the lakes, ranging from 313.8464 to 337.9052 (mean: 325.2304). Molecular formulas were assigned to 845–1,451 components. The previous study analysing lake DOM by both Orbitrap MS and FT-ICR MS reported that 1,652 formulas were obtained by Orbitrap MS (resolution mode: 100,000), while 6,510 formulas were assigned by 15T FT-ICR MS (Hawkes *et al.* 2016). As shown in Figure 1, more than 50% of the formulas were composed of carbon, hydrogen, and oxygen atoms (CHO) in all the lakes. In particular, more than 90% of molecular formulas were CHO-types in Lake Kamafusa, where DOC was the lowest. The CHOS-type molecular formulas occupied more than 10% in Lake Kasumigaura (11.3%), Lake Inba (14.9%), Lake Tega (23.5%), and Lake Kojima (19.7%). Figure 2 shows van Krevelen diagrams of assigned molecular formulas in the 11 lakes. Most of the CHO-type, CHON-type, and CHOS-type formulas fell in the regions of lignin and tannin. Interestingly, CHONS-types formulas were plotted in the same region ( $0.05 \leq H/C \leq 0.25$  and  $0.80 \leq O/C \leq 1.30$ ) in all the lakes. This is the first study to comprehensively compare DOM compositions in 11 major lakes in Japan. Based on this investigation, more data should be accumulated to reveal seasonal variations of DOM compositions in these lakes.

Cluster analysis was applied to categorise DOM compositions in the 11 lakes. As shown in Figure 3, DOM

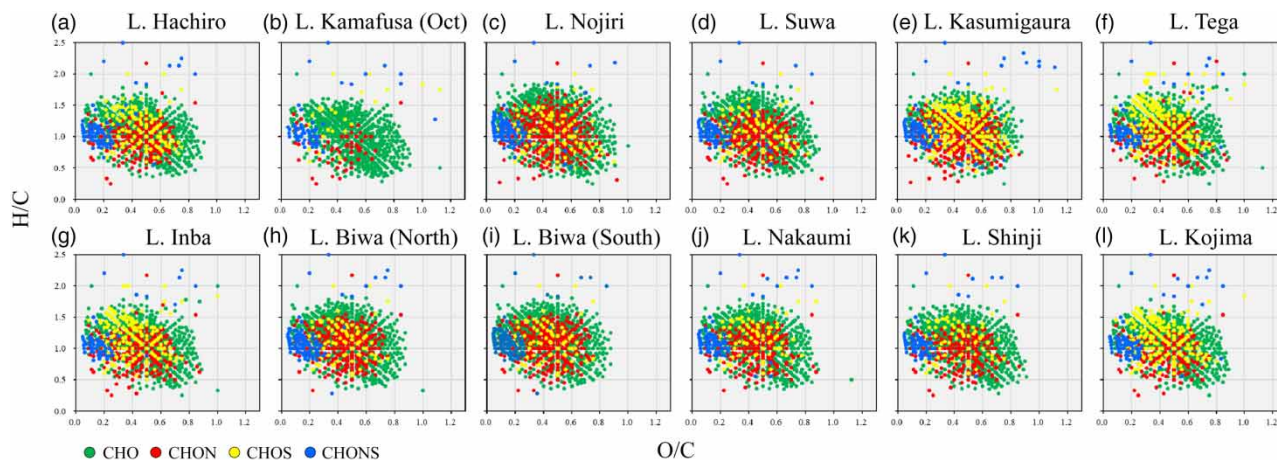

**Figure 2** | Van Krevelen diagrams of components in the 11 studied lakes.

compositions were classified into four clusters: Cluster 1 (Lake Biwa: North and South, Lake Nojiri, and Lake Kasumigaura), Cluster 2 (Lake Kamafusa), Cluster 3 (Lake Inba, Lake Tega, and Lake Kojima), and Cluster 4 (Lake Nakaumi, Lake Shinji, Lake Suwa, and Lake Hachiro). It is reasonable that the two Lake Biwa samples (North and South), two Lake Kamafusa samples (October and November), two closely located lakes in the same watershed (Lake Inba and Lake Tega), and two adjacent brackish lakes (Lake Nakaumi and Lake Shinji) were categorised with each other. However, the clustering pattern was not always attributable to the geological locations of the lakes. Figure S2 shows van Krevelen diagrams of (a) components commonly observed in all the lakes, (b) components commonly observed in Cluster 1, (c) components commonly observed in Cluster 2, (d) components commonly observed in Cluster 3, and (e) components commonly observed in Cluster 4. Many factors should affect the clustering pattern of DOM composition including hydraulic retention time, water temperature, history of lakes, and land-use pattern in the watershed (Kellerman *et al.* 2014). The 555 formulas commonly observed in all the lakes were mainly composed of CHO-type formulas. It is possible that they could derive from the same origins such as common vegetation in their watersheds and common features of DOM derived from internal production. Conversely, it is likely that the same molecular formulas do not always indicate that they are identical compounds since isomers cannot be distinguished only by molecular formulas. Among the common CHOS-type formulas, the identical formulas were

detected from wastewater effluent (Gonsior *et al.* 2011) and a river inflowing to Lake Inba (Yuthawong *et al.* 2017). Some of them were suspected to be biodegradation products (sulfophenyl carboxylic acids: SPC) of linear alkylbenzene sulfonates (LAS) such as  $C_{10}H_{12}O_5S$  (C4-SPC) and  $C_{11}H_{14}O_5S$  (C5-SPC), suggesting the wide prevalence of surfactant pollution.

Clusters 1 and 4 were characterised by CHON-type formulas while Cluster 3 was characterised by CHOS-type formulas. Lake Inba and Lake Tega in Cluster 3 are among the most polluted lakes in Japan. Some components with CHOS-type formulas could be generated by reaction of sulfide with DOM in anaerobic sediment (Melendez-Perez *et al.* 2018). Conversely, CHO-type formulas were dominant in Lake Kamafusa (Cluster 2). Lake Kamafusa is located in a mountainous region and it showed the highest SUVA values (Table 2). DOM with lignin tannin-like features could be derived from forests in the watershed. A predominance of lignin-like DOM components was also reported in the oligotrophic Lake Superior (Minor *et al.* 2012). Previous studies reported that DOM compositions were unique, depending on water types such as river water, groundwater, and wastewater effluent (Gonsior *et al.* 2011; Urai *et al.* 2014). Establishing a database of molecular-level DOM compositions in lake water and point-sources is required for identifying sources based on DOM composition.

Although Orbitrap MS is a powerful tool to reveal the molecular composition of DOM, several biases such as the solid-phase extraction and ionisation efficiency of molecules affect the results. Furthermore, the analytical window in this study is limited to  $m/z$  100–1,000, indicating that molecular ions with a single charge outside of the window are excluded from the analysis.

### Relationship between bulk parameters and molecular composition of DOM

The correlation between the relative intensity of the 555 components commonly observed in all the lakes and bulk parameters (SUVA,  $DCOD_{Mn}/DOC$ ,  $THMFP/DOC$ , and  $Chl-a/DOC$ ) in the 11 lakes was evaluated as shown in Figure 4. Similar components ( $0.5 \leq H/C \leq 1.5$  and  $0.1 \leq O/C \leq 0.8$ ) showed positive correlations with SUVA,  $DCOD_{Mn}/DOC$ , and  $THMFP/DOC$ , suggesting that these

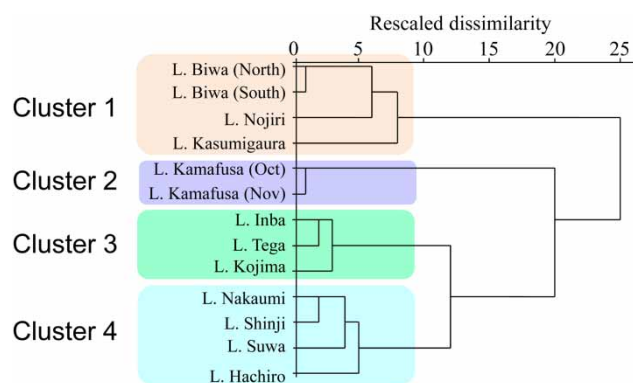

**Figure 3** | Cluster analysis of DOM compositions in the 11 studied lakes. Binary data of components were analysed by Ward's method.

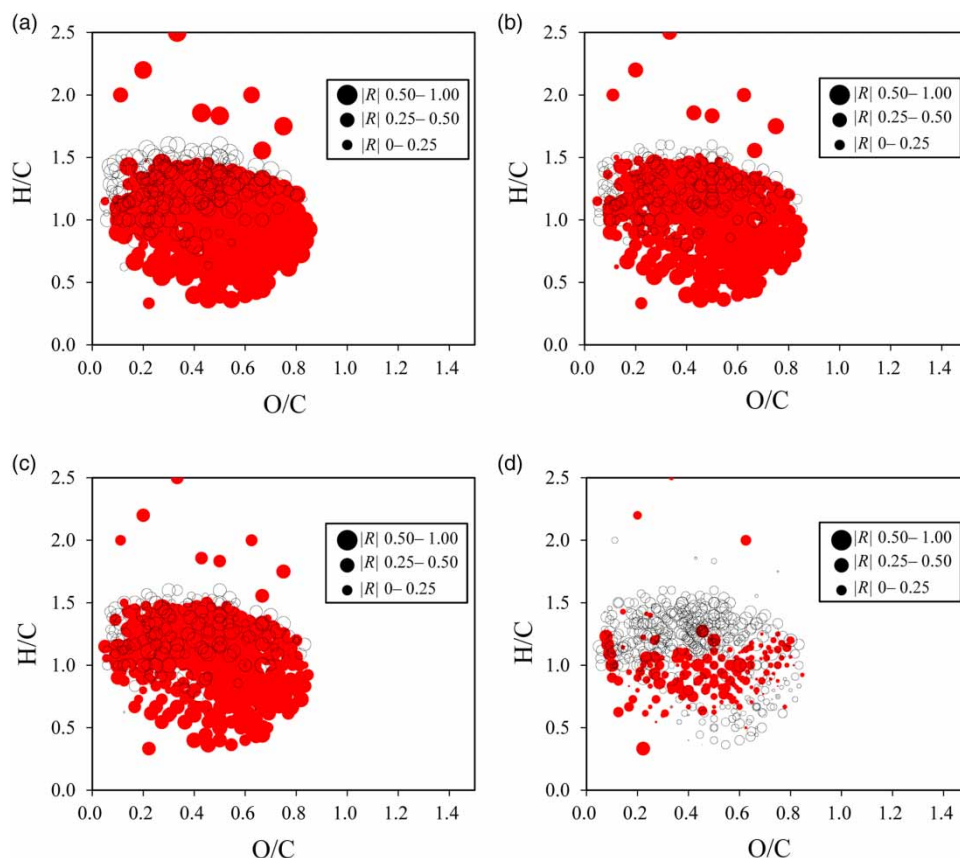

**Figure 4** | Correlation between the relative intensities of 555 common components and bulk parameters: (a) correlation with SUVA, (b) correlation with  $\text{DCOD}_{\text{Mn}}/\text{DOC}$ , (c) correlation with  $\text{THMFDP}/\text{DOC}$  (molar concentration base), and (d) correlation with  $\text{Chl-a}/\text{DOC}$ . Bubble size represents the magnitude of the coefficient of correlation. Closed red circles indicate positive correlations while open circles indicate negative correlations.

components overlapped with the lignin and tannin regions and could contribute to these properties. Conversely, these components showed a moderate positive or negative correlation with  $\text{Chl-a}/\text{DOC}$ . It is possible that algal DOM may not be clearly related to SUVA,  $\text{DCOD}_{\text{Mn}}/\text{DOC}$ , and  $\text{THMFDP}/\text{DOC}$ . Interestingly, some components with  $1.0 \leq \text{H/C} \leq 1.5$  and  $0.1 \leq \text{O/C} \leq 0.8$  demonstrated a negative correlation with all parameters.

Figure 5 represents examples of the highest correlations between the relative peak intensities of specific components and water quality parameters. The relative peak intensities of  $\text{C}_{21}\text{H}_{26}\text{O}_7$ ,  $\text{C}_{24}\text{H}_{32}\text{O}_{10}$ , and  $\text{C}_{21}\text{H}_{28}\text{O}_{10}$  were significantly correlated with SUVA ( $R = 0.93$ ,  $p < 0.05$ ),  $\text{DCOD}_{\text{Mn}}/\text{DOC}$  ( $R = 0.80$ ,  $p < 0.05$ ), and  $\text{THMFDP}/\text{DOC}$  ( $R = 0.88$ ,  $p < 0.05$ ), respectively. Conversely, the correlation coefficient between the relative peak intensities of nitrogen-bearing formula ( $\text{C}_{15}\text{H}_{15}\text{O}_9\text{N}$ ) and  $\text{Chl-a}/\text{DOC}$  was not significant

( $R = 0.54$ ,  $p > 0.05$ ). It is possible that  $\text{Chl-a}$ , which is an indicator of algae, is not directly associated with DOM components. Compounds corresponding to these formulas could be responsible for these specific water quality parameters. It is also possible that compounds other than the 555 common components could contribute to unique water quality in each lake. However, it is likely that a component with a formula contains several isomers. Further studies, including the structural characterisation of components by MS/MS (Merel *et al.* 2017), are necessary to discuss the relationship with water quality parameters.

#### Screening $\text{DCOD}_{\text{Mn}}$ components in lake water

Pre-treatment by permanganate oxidation was applied to classify DOM components into  $\text{DCOD}_{\text{Mn}}$  and persistent components (Figure 6, Figure S3). Except for Lake Nakaumi

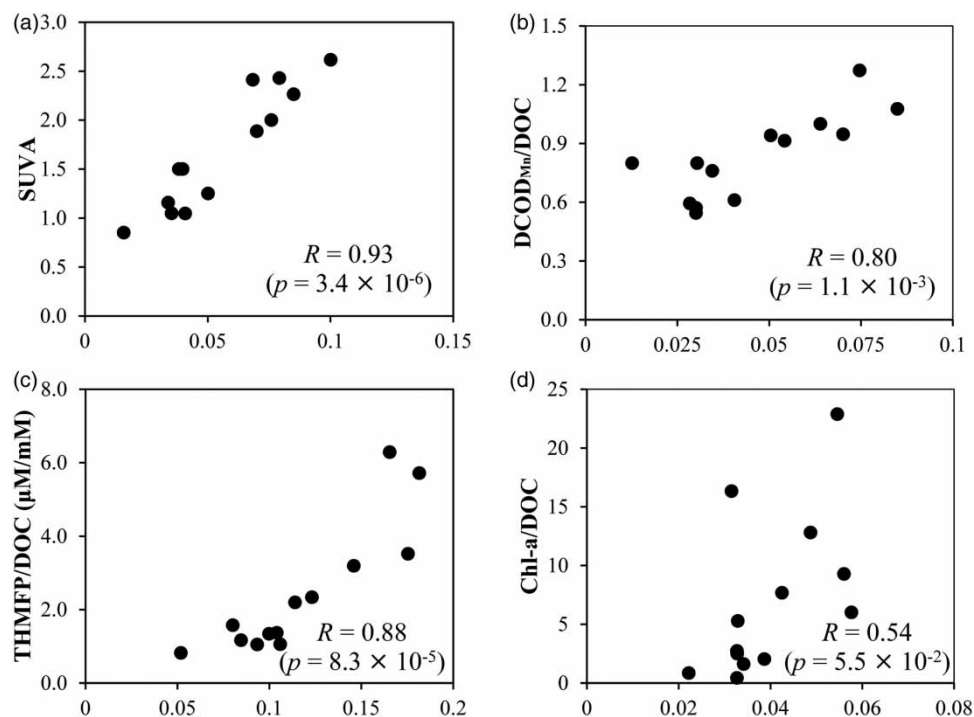

**Figure 5** | The highest correlation between relative peak intensities of specific components and water quality parameters: (a) relative peak intensities of  $C_{21}H_{26}O_7$  vs SUVA, (b) relative peak intensities of  $C_{24}H_{32}O_{10}$  vs  $DCOD_{Mn}/DOC$ , (c) relative peak intensities of  $C_{21}H_{28}O_{10}$  vs THMFP/DOC ( $\mu M/mM$ ), and (d) relative peak intensities of  $C_{15}H_{15}O_9N$  vs Chl-a/DOC.

(54%) whose  $DCOD_{Mn}/DOC$  was the highest (Table 2), only 15%–36% of components were categorised as  $DCOD_{Mn}$  components in the other lakes. Intensity-based percentages showed that  $DCOD_{Mn}$  components accounted for only 7%–30% (mean: 15%) of total peak intensities. These results clearly demonstrate that only a minor fraction of DOM is monitored as  $DCOD_{Mn}$ , which was consistent with previous study on the limitation of permanganate oxidation (Geerdink *et al.* 2017; Yuthawong *et al.* 2019). The molecular-level analysis clearly demonstrated that  $COD_{Mn}$  is not a comprehensive indicator of DOM in lake water.

Table S1 shows the molecular characteristics of  $DCOD_{Mn}$  and persistent components. For all lakes, the number-averaged molecular weight and O/C of  $DCOD_{Mn}$  components were larger than those of persistent components, while the number-averaged H/C of  $DCOD_{Mn}$  components were smaller than those of persistent components. The number-averaged DBE-O of  $DCOD_{Mn}$  components were larger than those of persistent components in Lake Kamafusa (October and November), Lake Suwa, Lake Kasumigaura,

Lake Inba, Lake Nakaumi, Lake Shinji, and Lake Kojima, indicating that unsaturated components were preferentially oxidised by permanganate. Conversely, the number-averaged DBE-O of  $DCOD_{Mn}$  components in the other lakes were smaller than those of persistent components. These results suggest that the components contributing to  $DCOD_{Mn}$  could be dependent on lakes.

## CONCLUSIONS

High-resolution Orbitrap MS revealed the DOM composition in the 11 studied lakes were characteristic. However, 38–66% of components in each lake were common among the lakes. The relationship between the relative peak intensities of these common components and water quality parameters such as SUVA,  $DCOD_{Mn}/DOC$ , and THMFP/DOC could extract key candidates related to specific water quality, which is informative for water quality management. Pre-treatment by permanganate coupled with



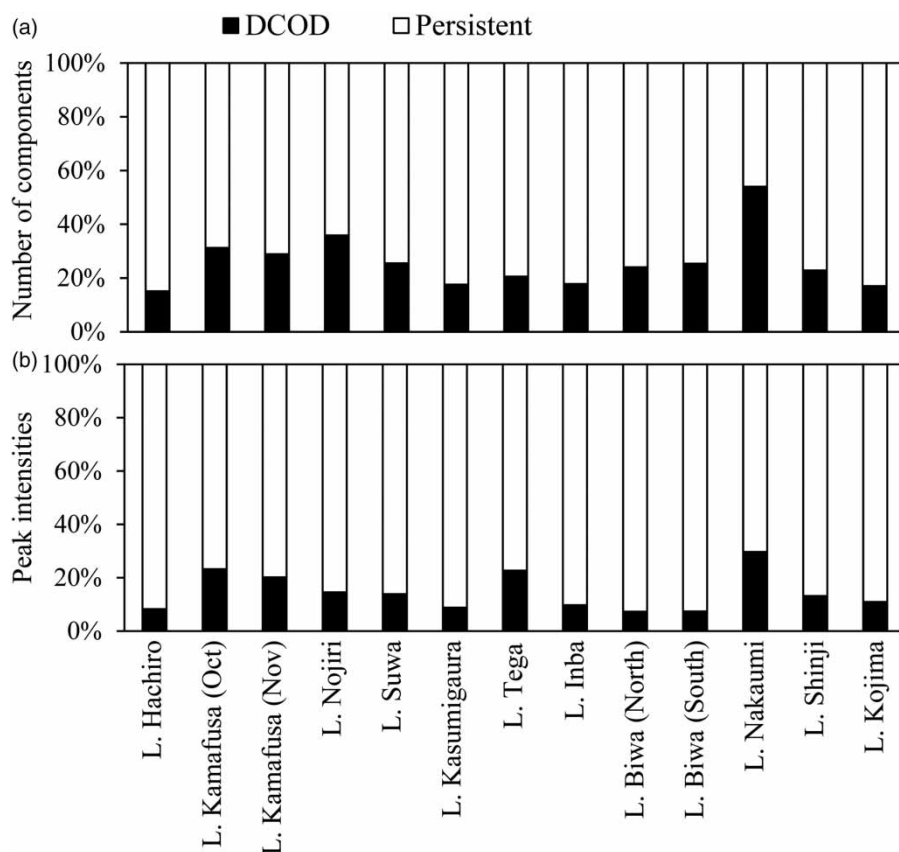

**Figure 6** | Classification of DCOD<sub>Mn</sub> components and persistent components in the 11 studied lakes based on (a) number and (b) relative peak intensities of components.

Orbitrap MS revealed that components with higher molecular weight, higher O/C, and lower H/C could be selectively responsible for DCOD<sub>Mn</sub>, demonstrating clear evidence of the insufficient oxidation performance of permanganate.

## ACKNOWLEDGEMENTS

This research was partially supported by the Environment Research and Technology Development Fund (Grant No. 5RF-1601), Ministry of the Environment, Japan.

## SUPPLEMENTARY MATERIAL

The Supplementary Material for this paper is available online at <https://dx.doi.org/10.2166/ws.2020.042>.

## REFERENCES

- Bai, L., Cao, C., Wang, C., Xu, H., Zhang, H., Slaveykova, V. I. & Jiang, H. 2017 Toward quantitative understanding of the bioavailability of dissolved organic matter in freshwater lake during cyanobacteria blooming. *Environmental Science & Technology* **51** (11), 6018–6026.
- Bittar, T. B., Vieira, A. A. H., Stubbins, A. & Mopper, K. 2015 Competition between photochemical and biological degradation of dissolved organic matter from the cyanobacteria *Microcystis aeruginosa*. *Limnology and Oceanography* **60** (4), 1172–1194.
- Dittmar, T., Koch, B., Hertkorn, N. & Kattner, G. 2008 A simple and efficient method for the solid-phase extraction of dissolved organic matter (SPE-DOM) from seawater. *Limnology and Oceanography: Methods* **6** (6), 230–235.
- Geerdink, R. B., Sebastiaan van den Hurk, R. & Epema, O. J. 2017 Chemical oxygen demand: historical perspectives and future challenges. *Analytica Chimica Acta* **961**, 1–11.
- Gonsior, M., Zwartjes, M., Cooper, W. J., Song, W., Ishida, K. P., Tseng, L. Y., Jeung, M. K., Rosso, D., Hertkorn, N. & Schmitt-Kopplin, P. 2011 Molecular characterization of effluent

- organic matter identified by ultrahigh resolution mass spectrometry. *Water Research* **45** (9), 2943–2953.
- Hawkes, J. A., Dittmar, T., Patriarca, C., Tranvik, L. & Bergquist, J. 2016 Evaluation of the Orbitrap mass spectrometer for the molecular fingerprinting analysis of natural dissolved organic matter. *Analytical Chemistry* **88** (15), 7698–7704.
- Herzprung, P., Hertkorn, N., von Tümpling, W., Harir, M., Friese, K. & Schmitt-Kopplin, P. 2014 Understanding molecular formula assignment of Fourier transform ion cyclotron resonance mass spectrometry data of natural organic matter from a chemical point of view. *Analytical and Bioanalytical Chemistry* **406** (30), 7977–7987.
- Imai, A., Matsushige, K. & Nagai, T. 2003 Trihalomethane formation potential of dissolved organic matter in a shallow eutrophic lake. *Water Research* **37** (17), 4284–4294.
- Japan Water Works Association 2001 *Standard Method for the Examination of Water*. JWWA, Tokyo, Japan (in Japanese).
- Jiang, T., Chen, X., Wang, D., Liang, J., Bai, W., Zhang, C., Wang, Q. & Wei, S. 2018 Dynamics of dissolved organic matter (DOM) in a typical inland lake of the Three Gorges Reservoir area: fluorescent properties and their implications for dissolved mercury species. *Journal of Environmental Management* **206**, 418–429.
- Kawasaki, N., Komatsu, K., Kohzu, A., Tomioka, N., Shinohara, R., Satou, T., Watanabe, F. N., Tada, Y., Hamasaki, K., Kushairi, M. R. M. & Imai, A. 2013 Bacterial contribution to dissolved organic matter in eutrophic lake Kasumigaura, Japan. *Applied and Environmental Microbiology* **79** (23), 7160–7168.
- Kellerman, A. M., Dittmar, T., Kothawala, D. N. & Tranvik, L. J. 2014 Chemodiversity of dissolved organic matter in lakes driven by climate and hydrology. *Nature Communications* **5**, 3804.
- Kim, S., Kramer, R. W. & Hatcher, P. G. 2003 Graphical method for analysis of ultrahigh-resolution broadband mass spectra of natural organic matter, the van Krevelen diagram. *Analytical Chemistry* **75** (20), 5336–5344.
- Kim, S., Kaplan, L. A. & Hatcher, P. G. 2006 Biodegradable dissolved organic matter in a temperate and a tropical stream determined from ultra-high resolution mass spectrometry. *Limnology and Oceanography* **51** (2), 1054–1063.
- Kind, T. & Fiehn, O. 2007 Seven golden rules for heuristic filtering of molecular formulas obtained by accurate mass spectrometry. *BMC Bioinformatics* **8**, 105.
- Kujawinski, E. B. & Behn, M. D. 2006 Automated analysis of electrospray ionization Fourier transform ion cyclotron resonance mass spectra of natural organic matter. *Analytical Chemistry* **78** (13), 4363–4373.
- Le Moal, M., Gascuel-Oudou, C., Ménesguen, A., Souchon, Y., Étrillard, C., Levain, A., Moatar, F., Pannard, A., Souchu, P., Lefebvre, A. & Pinay, G. 2019 Eutrophication: a new wine in an old bottle? *Science of the Total Environment* **651** (Pt 1), 1–11.
- Maizel, A. C., Li, J. & Remucal, C. K. 2017 Relationships between dissolved organic matter composition and photochemistry in lakes of diverse trophic status. *Environmental Science & Technology* **51** (17), 9624–9632.
- Melendez-Perez, J. J., Martínez-Mejía, M. J., Barcellos, R. L., Fetter-Filho, A. F. H. & Eberlin, M. N. 2018 A potential formation route for CHOS compounds in dissolved organic matter. *Marine Chemistry* **202**, 67–72.
- Merel, S., Lege, S., Yanez Heras, J. E. & Zwiener, C. 2017 Assessment of N-oxide formation during wastewater ozonation. *Environmental Science & Technology* **51** (1), 410–417.
- Ministry of the Environment in Japan 2018 Results of the FY 2017 water quality survey of public water areas. Available from: <http://www.env.go.jp/water/suiiki/h29/h29-1.pdf> (in Japanese).
- Minor, E. C., Steinbring, C. J., Longnecker, K. & Kujawinski, E. B. 2012 Characterization of dissolved organic matter in Lake Superior and its watershed using ultrahigh resolution mass spectrometry. *Organic Geochemistry* **43**, 1–11.
- Mostovaya, A., Hawkes, J. A., Dittmar, T. & Tranvik, L. J. 2017 Molecular determinants of dissolved organic matter reactivity in lake water. *Frontiers in Earth Science* **5**, 106.
- Phungchai, P., Kurisu, F., Kasuga, I. & Furumai, H. 2016 Molecular characterization of low molecular weight dissolved organic matter in water reclamation processes using Orbitrap mass spectrometry. *Water Research* **100**, 526–536.
- Phungchai, P., Kurisu, F., Kasuga, I. & Furumai, H. 2018 Changes in dissolved organic matter composition and disinfection byproduct precursors in advanced drinking water treatment processes. *Environmental Science & Technology* **52** (6), 3392–3401.
- Strock, K. E., Saros, J. E., Nelson, S. J., Birkel, S. D., Kahl, J. S. & McDowell, W. H. 2016 Extreme weather years drive episodic changes in lake chemistry: implications for recovery from sulfate deposition and long-term trends in dissolved organic carbon. *Biogeochemistry* **127** (2), 353–365.
- Strock, K. E., Theodore, N., Gawley, W. G., Ellsworth, A. C. & Saros, J. E. 2017 Increasing dissolved organic carbon concentrations in northern boreal lakes: implications for lake water transparency and thermal structure. *Journal of Geophysical Research: Biogeosciences* **122** (5), 1022–1035.
- Urai, M., Kasuga, I., Kurisu, F. & Furumai, H. 2014 Molecular characterization of dissolved organic matter in various urban water resources using Orbitrap Fourier transform mass spectrometry. *Water Science & Technology: Water Supply* **14** (4), 547–553.
- Yuthawong, V., Kasuga, I., Kurisu, F. & Furumai, H. 2017 Comparison of low molecular weight dissolved organic matter compositions in Lake Inba and Kashima River by Orbitrap mass spectrometry. *Journal of Water and Environment Technology* **15** (1), 12–21.
- Yuthawong, V., Kasuga, I., Kurisu, F. & Furumai, H. 2019 Molecular-level changes in dissolved organic matter compositions in Lake Inba water during KMnO<sub>4</sub> oxidation: assessment by Orbitrap mass spectrometry. *Journal of Water and Environment Technology* **17** (1), 27–39.
